# Supplementary material for: The deep-rooted origin of disulfide-rich spider venom toxins
Source: eLife journal article supplement (doi:10.7554/elife.83761), 2023-02-09
Supplement: fig5-data1 [file Figure 5 - Source data_araneomorph SF.xlsx]

## Sheet: evolution of Araneomorph SF
	Molecular evolution of Araneomorphae toxin superfamilies
	PAMLa (M8)			FUBARb		MEMEc		TreeSAAP
	AA	ω						Radical Property
								Chemical		Physical
	SF34
	L57	0.9494		ω>1d:6		2
	R83			ω<1e:7
	SF36
	T34	0.9638		ω>1d:3		2
	V56			ω<1e:6
	SF37
	0	0.0318		ω>1d:0		0
				ω<1e:9
	SF38
	0	0.6467		ω>1d:0		2
				ω<1e:2
	SF40
	D41	1.0142		ω>1d:2		4
	I42			ω<1e:12						αc
	S44
	G45
	Q46
	F58									Ns
	N64
	N67
	G69							h		αc
	Q70							h		αc
	SF42
	0	0.3161		ω>1d:1		1
				ω<1e:12
	SF44
	0	0.8503		ω>1d:2		2
				ω<1e:2
	SF45
	0	0.3662		ω>1d:2		0
				ω<1e:4
	SF46
	D103	0.3635		ω>1d:3		0
				ω<1e:11
	SF47
	0	0.0861		ω>1d:0		0
				ω<1e:57
	SF48
	0	0.1674		ω>1d:1		1
				ω<1e:20
	SF50
	0	0.4939		ω>1d:0		6
				ω<1e:20
	SF51
	0	0.3475		ω>1d:2		0
				ω<1e:4
	SF55
	0	0.2892		ω>1d:0		0
				ω<1e:2
	SF58
	0	0.5436		ω>1d:1		1
				ω<1e:4
	SF59
	0	0.4836		ω>1d:0		0
				ω<1e:2
	SF60
	0	0.7111		ω>1d:2		2
				ω<1e:5
	SF66
	G62	0.997		ω>1d:1		2
	E83			ω<1e:1
	E91
	S112
	SF68
	N61	0.6302		ω>1d:2		4
	I76			ω<1e:6						αc
	E79
	SF69
	0	0.6077		ω>1d:1		1
				ω<1e:10
	SF109
	0	0.4641		ω>1d:4		2
				ω<1e:30
	SF110
	E23	0.9765		ω>1d:3		2		Ra
	E24			ω<1e:4				Ra
