# Supplementary material for: The deep-rooted origin of disulfide-rich spider venom toxins
Source: eLife journal article supplement (doi:10.7554/elife.83761), 2023-02-09
Supplement: fig5-data1 [file Figure 5 - Source data_mygalomorph SF.xlsx]

## Sheet: evolution of Mygalomorph SF
	Molecular evolution of Mygalomorphae toxin superfamilies
	PAMLa (M8)		FUBARb	MEMEc	TreeSAAP
	AA	ω			Radical Property
					Chemical	Physical
	SF2
	R60	1.1963	ω>1d:6	34		F, Mv, Mw, Vº, Ra, Hp, Ht
	S62		ω<1e:6			Vº, Ra, Hp, αn
	L63				pK	Vº, Ra, Hp
	A66					F, Ra, Hp, αn, Kº
	C68					αc, Mv, αn, Kº
	D69					αc, Kº
	SF4
	T101	0.8469	ω>1d:3	33
	V102		ω<1e:11
	G103					Pα
	G105					Pα
	SF7
	N89	2.428	ω>1d:4	6
	K90		ω<1e:0
	N92
	A93
	S94
	S95
	N96
	N97
	L98
	SF9
	T73	0.7316	ω>1d:9	25		Bl, αn
	S79		ω<1e:11
	SF10
	0	0.8767	ω>1d:4	3
			ω<1e:4
	SF13
	N100	0.8252	ω>1d:5	6
	G110		ω<1e:4
	L111
	SF14
	G86	1.9715	ω>1d:2	34
	H90		ω<1e:4			Ra
	R91
	L97
	G98
	Q99
	A100
	I101					Bl
	L102					Bl
	T103
	G104					Ra
	F105				Esm	Ra, αn
	S106				h, Esm	αn, RF
	T107				h	αn, RF
	V108					αn
	T109
	N110					RF
	G111					Ra, RF
	L112				h, Esm	Ra
	S113				h, Esm	Bl, αn
	A114					Bl, αn
	I115
	F116
	C117					RF
	A118					RF
	A119
	SF17
	W100	1.2169	ω>1d:0	4
	T105		ω<1e:2			αm
	R106					αm
	L107
	S110
	L111
	SF19
	Q19	1.7945	ω>1d:3	3
	R38		ω<1e:1
	D47
	K51
	A52
	F62
	Q63
	D66
	Y68
	S70
	SF20
	S25	1.0695	ω>1d:0	12
	V37		ω<1e:3
	I55
	V92
	E95					Pc
	P96
	T97
	L98
	T99
	W100
	Y102
	A103
	S104
	Y106
	C107
	Y108					Pc
	K111
	S112
	SF26
	N59	1.0694	ω>1d:5	17
	E60		ω<1e:13		p	Bl, Hp
	K61				p	Bl, Hp
	E62					Hp, αn
	S64				p	Bl, Hp, αn
	S65				p	Bl, Hp
	G68
	R69
	T70
	A75				p
	G77					Bl, αn
	V79				p	Hp
	N80					αn
	E81					αn
	SF74
	K51	1.6307	ω>1d:5	8
	F54		ω<1e:2
	D55
	T58
	P33
	N67
	R68
	D72
	H74
	W79
	K80
	SF77
	M57	1.2384	ω>1d:7	6
	S62		ω<1e:3
	K63
	E65
	R75
	T76				Esm
	F77				Esm
	N78
	G84
	S87
	SF79
	0	1.3007	ω>1d:1	0
			ω<1e:0
	SF84
	N76	0.7488	ω>1d:6	4		αn
	K78		ω<1e:7
	A84					αc
	N85					αc
	S87					αc
	P88					αc
	S91
	S94
	E97					αn
	L104
	K106
	I112
	N115
	SF89
	S67	2.9549	ω>1d:1	0
	S104		ω<1e:0			Mv
	F105					Mv
	S106
	C108					αn
	V109					αn
	SF90
	E32	1.5977	ω>1d:3	1
	K38		ω<1e:11
	L60
	D63
	K112
	SF92
	V3	2.4954	ω>1d:8	3
	L9		ω<1e:0
	P49
	F54
	K64					Hp, αn, Kº
	P65					Hp, αn, Kº
	K68					αc, Kº
	V85
	SF99
	0	1.3179	ω>1d:1	0
			ω<1e:1
