# Supplementary material for: The deep-rooted origin of disulfide-rich spider venom toxins
Source: eLife. 2023 Feb 9;12:e83761. doi: 10.7554/eLife.83761 (PMC10017107; doi:10.7554/eLife.83761)
Supplement: Supplementary file 1. — The table lists spider toxin superfamilies described till date with names conferred upon and their respective mythological references. A list of genera from which the superfamily was identified has also been provided. [file elife-83761-supp1.xlsx]

## Sheet: List of spider toxin SF
Infraorder	Described from (genera)	Superfamily Number	Superfamily Name	Mythology	Identified by
Mygalomorphae	Hadronyche	SF1	AhPuch	Mayan	Pineda et al. (2020 PNAS)
Mygalomorphae	Hadronyche	SF2	Anat	Egyptian	Pineda et al. (2020 PNAS)
Mygalomorphae	Hadronyche	SF3	Hades	Greek	Pineda et al. (2020 PNAS)
Mygalomorphae	Hadronyche	SF4	Erlik	Turkic	Pineda et al. (2020 PNAS)
Mygalomorphae	Hadronyche	SF5	Chi-You	Chinese	Pineda et al. (2020 PNAS)
Mygalomorphae	Hadronyche	SF6	‘Oro	Polynesian	Pineda et al. (2020 PNAS)
Mygalomorphae	Hadronyche	SF7	Pele	Hawaiian	Pineda et al. (2020 PNAS)
Mygalomorphae	Hadronyche	SF8	Ixtab	Mayan	Pineda et al. (2020 PNAS)
Mygalomorphae	Atrax, Hadronyche	SF9	Shiva	Hindu	Pineda et al. (2014, BMC genomics)
Mygalomorphae	Atrax, Hadronyche	SF10	Kisin	Mayan	Pineda et al. (2020 PNAS)
Mygalomorphae	Hadronyche	SF11	Thanatos	Greek	Pineda et al. (2020 PNAS)
Mygalomorphae	Hadronyche	SF12	Sekhmet	Egyptian	Pineda et al. (2020 PNAS)
Mygalomorphae	Atrax, Hadronyche	SF13	Ares	Greek	Pineda et al. (2020 PNAS)
Mygalomorphae	Hadronyche	SF14	Wurrukatte	Hittite	Pineda et al. (2020 PNAS)
Mygalomorphae	Hadronyche	SF15	Pluto	Greek	Pineda et al. (2020 PNAS)
Mygalomorphae	Hadronyche	SF16	Zahhak	Persian	Pineda et al. (2020 PNAS)
Mygalomorphae	Hadronyche	SF17	Nergal	Mesopotamian	Pineda et al. (2020 PNAS)
Mygalomorphae	Hadronyche	SF18	Grim Reaper	Greek	Pineda et al. (2020 PNAS)
Mygalomorphae	Hadronyche	SF19	Yama	Hindu	Pineda et al. (2020 PNAS)
Mygalomorphae	Hadronyche	SF20	Ereshkigal	Mesopotamian	Pineda et al. (2020 PNAS)
Mygalomorphae	Hadronyche	SF21	Anubis	Egyptian	Pineda et al. (2020 PNAS)
Mygalomorphae	Hadronyche	SF22	Loke	Norse	Pineda et al. (2020 PNAS)
Mygalomorphae	Hadronyche	SF23	Qumaits		Pineda et al. (2020 PNAS)
Mygalomorphae	Hadronyche	SF24	Ankou	Breton	Pineda et al. (2020 PNAS)
Mygalomorphae	Hadronyche	SF25	Tezcatlipoca	Aztec	Pineda et al. (2020 PNAS)
Mygalomorphae	Hadronyche	SF26	Set	Egyptian	Pineda et al. (2020 PNAS)
Mygalomorphae	Hadronyche	SF27	Mara	Slav	Pineda et al. (2020 PNAS)
Mygalomorphae	Hadronyche	SF28	Tuoni	Finnish	Pineda et al. (2020 PNAS)
Mygalomorphae	Hadronyche	SF29	Mars	Roman	Pineda et al. (2020 PNAS)
Mygalomorphae	Hadronyche	SF30	Sauron		Pineda et al. (2020 PNAS)
Mygalomorphae	Hadronyche	SF31	Hulda	Scandinavian	Pineda et al. (2020 PNAS)
Mygalomorphae	Hadronyche	SF32	Midgardsormen	Norse	Pineda et al. (2020 PNAS)
Mygalomorphae	Hadronyche	SF33	Mehnhit	Nubian	Pineda et al. (2020 PNAS)
Araneomorphae	Anahita, Ctenus, Isoctenus, Leptoctenus, Phoneutria	SF34	Neelkantha	Hindu	This study (Shaikh and Sunagar)
Araneomorphae	Phoneutria	SF35	Mritunjaya	Hindu	This study (Shaikh and Sunagar)
Araneomorphae	Anahita, Ctenus, Isoctenus, Leptoctenus, Phoneutria	SF36	Osiris	Egyptian	This study (Shaikh and Sunagar)
Araneomorphae	Ctenus, Homalonychus, Isoctenus, Leptoctenus, Phoneutria, Psechrus	SF37	Cōātlīcue	Aztec	This study (Shaikh and Sunagar)
Araneomorphae	Anahita, Ctenus, Phoneutria	SF38	Vanth	Etruscan	This study (Shaikh and Sunagar)
Araneomorphae	Ctenus, Fecenia, Hippasa, Nilus, Oxyopes, Psechrus, Sphedanus	SF39	Achlys	Greek	This study (Shaikh and Sunagar)
Araneomorphae	Ctenus, Isoctenus, Phoneutria	SF40	Enma	Buddhist	This study (Shaikh and Sunagar)
Araneomorphae	Ctenus, Fecenia, Nilus, Oxyopes, Psechrus, Sphedanus	SF41	Batara Kala	Javanese	This study (Shaikh and Sunagar)
Araneomorphae	Anahita, Ctenus, Fecenia, Isoctenus, Leptoctenus, Phoneutria, Psechrus	SF42	Perses	Greek	This study (Shaikh and Sunagar)
Araneomorphae	Anahita, Ctenus	SF43	Nerio	Roman	This study (Shaikh and Sunagar)
Araneomorphae	Ctenus, Isoctenus, Leptoctenus, Phoneutria	SF44	Ninurta	Mesopotamian	This study (Shaikh and Sunagar)
Araneomorphae	Ctenus, Leptoctenus	SF45	Anansi	Akan	This study (Shaikh and Sunagar)
Araneomorphae	Anahita, Ctenus, Isoctenus, Leptoctenus, Phoneutria	SF46	Kartikeya	Hindu	This study (Shaikh and Sunagar)
Araneomorphae	Ctenus, Habronattus, Leptoctenus, Nilus, Peucetia, Pisaurina, Psechrus, Sphedanus	SF47	Týr	Germanic	This study (Shaikh and Sunagar)
Araneomorphae	Ctenus, Isoctenus, Leptoctenus, Phoneutria	SF48	Orcus	Etruscan	This study (Shaikh and Sunagar)
Araneomorphae	Ctenus	SF49	Mangala	Hindu	This study (Shaikh and Sunagar)
Araneomorphae	Ctenus, Fecenia, Isoctenus, Leptoctenus, Nilus, Oxyopes, Phoneutria	SF50	Oneiros	Greek	This study (Shaikh and Sunagar)
Araneomorphae	Ctenus, Isoctenus, Phoneutria	SF51	Omisha	Hindu	This study (Shaikh and Sunagar)
Araneomorphae	Hippasa, Sphedanus, Thomisus	SF52	Nephthys	Egyptian	This study (Shaikh and Sunagar)
Araneomorphae	Anahita, Ctenus	SF53	Baldur	Germanic	This study (Shaikh and Sunagar)
Araneomorphae	Ctenus, Phoneutria	SF54	Morrigan	Irish	This study (Shaikh and Sunagar)
Araneomorphae	Ctenus	SF55	Deimos	Greek	This study (Shaikh and Sunagar)
Araneomorphae	Ctenus, Leptoctenus	SF56	Enyo	Greek	This study (Shaikh and Sunagar)
Araneomorphae	Ctenus, Phoneutria	SF57	Tuoni	Finnish	This study (Shaikh and Sunagar)
Araneomorphae	Anahita, Ctenus, Isoctenus, Phoneutria	SF58	Supay	Incan	This study (Shaikh and Sunagar)
Araneomorphae	Ctenus, Phoneutria	SF59	Neith	Egyptian	This study (Shaikh and Sunagar)
Araneomorphae	Ctenus, Isoctenus, Phoneutria	SF60	Hela	Norse	This study (Shaikh and Sunagar)
Araneomorphae	Ctenus, Fecenia, Nilus, Oxyopes, Psechrus, Sphedanus	SF61	Persephone	Greek	This study (Shaikh and Sunagar)
Araneomorphae	Ctenus, Nilus, Oxyopes, Psechrus, Sphedanus	SF62	Nyx	Greek	This study (Shaikh and Sunagar)
Araneomorphae	Ctenus	SF63	Artemis	Greek	This study (Shaikh and Sunagar)
Araneomorphae	Ctenus, Phoneutria	SF64	Bellona	Roman	This study (Shaikh and Sunagar)
Araneomorphae	Phoneutria	SF65	Serqet	Egyptian	This study (Shaikh and Sunagar)
Araneomorphae	Ctenus, Phoneutria	SF66	Phobos	Greek	This study (Shaikh and Sunagar)
Araneomorphae	Ctenus, Phoneutria	SF67	Dedun	Nubian	This study (Shaikh and Sunagar)
Araneomorphae	Ctenus, Isoctenus, Phoneutria	SF68	Seker	Greek	This study (Shaikh and Sunagar)
Araneomorphae	Anahita, Ctenus, Isoctenus, Phoneutria	SF69	Aita	Etruscan	This study (Shaikh and Sunagar)
Araneomorphae	Ctenus	SF70	Keres	Greek	This study (Shaikh and Sunagar)
Araneomorphae	Ctenus, Hippasa, Oxyopes, Psechrus, Sphedanus	SF71	Izanami	Japanese	This study (Shaikh and Sunagar)
Mygalomorphae	Trittame	SF72	Kali	Hindu	This study (Shaikh and Sunagar)
Mygalomorphae	Haplopelma	SF73	Mohini	Hindu	This study (Shaikh and Sunagar)
Mygalomorphae	Haplopelma	SF74	Bhairavi	Hindu	This study (Shaikh and Sunagar)
Mygalomorphae	Grammostola	SF75	Durga	Hindu	This study (Shaikh and Sunagar)
Mygalomorphae	Haplopelma	SF76	Varahi	Hindu	This study (Shaikh and Sunagar)
Mygalomorphae	Chilobrachys	SF77	Yaksha	Hindu	This study (Shaikh and Sunagar)
Mygalomorphae	Grammostola	SF78	Rudra	Hindu	This study (Shaikh and Sunagar)
Mygalomorphae	Haplopelma	SF79	Skadi	Norse	This study (Shaikh and Sunagar)
Mygalomorphae	Grammostola	SF80	Mictlāntēcutli	Aztec	This study (Shaikh and Sunagar)
Mygalomorphae	Chilobrachys	SF81	Loviatar	Finnish	This study (Shaikh and Sunagar)
Mygalomorphae	Chilobrachys	SF82	Nirrti	Hindu	This study (Shaikh and Sunagar)
Mygalomorphae	Chilobrachys	SF83	Skanda	Hindu	This study (Shaikh and Sunagar)
Mygalomorphae	Trittame	SF84	Apophis	Egyptian	This study (Shaikh and Sunagar)
Mygalomorphae	Haplopelma	SF85	Marjing	Meitei	This study (Shaikh and Sunagar)
Mygalomorphae	Chilobrachys	SF86	Aqen	Egyptian	This study (Shaikh and Sunagar)
Mygalomorphae	Trittame	SF87	Nikumbala	Hindu	This study (Shaikh and Sunagar)
Mygalomorphae	Trittame	SF88	Chandi	Hindu	This study (Shaikh and Sunagar)
Mygalomorphae	Haplopelma	SF89	Kalki	Hindu	This study (Shaikh and Sunagar)
Mygalomorphae	Haplopelma	SF90	Sharaba	Hindu	This study (Shaikh and Sunagar)
Mygalomorphae	Haplopelma	SF91	Shasta	Hindu	This study (Shaikh and Sunagar)
Mygalomorphae	Haplopelma	SF92	Virabhadra	Hindu	This study (Shaikh and Sunagar)
Mygalomorphae	Grammostola	SF93	Hachiman	Shinto	This study (Shaikh and Sunagar)
Mygalomorphae	Haplopelma	SF94	Parvati	Hindu	This study (Shaikh and Sunagar)
Mygalomorphae	Haplopelma	SF95	Gurzil	Berber	This study (Shaikh and Sunagar)
Mygalomorphae	Chilobrachys	SF96	Fenrir	Norse	This study (Shaikh and Sunagar)
Mygalomorphae	Haplopelma	SF97	Maahes	Greek	This study (Shaikh and Sunagar)
Mygalomorphae	Grammostola	SF98	Ganesh	Hindu	This study (Shaikh and Sunagar)
Mygalomorphae	Haplopelma	SF99	Maher	Aksumite	This study (Shaikh and Sunagar)
Mygalomorphae	Hadronyche	SF100	Dhumavati	Hindu	This study (Shaikh and Sunagar)
Mygalomorphae	Chilobrachys	SF101	Xargi	Siberian	This study (Shaikh and Sunagar)
Mygalomorphae	Grammostola	SF102	Tartarus	Greek	This study (Shaikh and Sunagar)
Mygalomorphae	Hadronyche	SF103	Ravana	Hindu	This study (Shaikh and Sunagar)
Mygalomorphae	Hadronyche	SF104	Asmodeus	Greek	This study (Shaikh and Sunagar)
Araneomorphae	Dolomedes	SF105	Ammit	Egyptian	This study (Shaikh and Sunagar)
Araneomorphae	Dolomedes	SF106	Isfet	Egyptian	This study (Shaikh and Sunagar)
Araneomorphae	Dolomedes	SF107	Sabazios	Balkan	This study (Shaikh and Sunagar)
Araneomorphae	Dolomedes	SF108	Tohil	Mayan	This study (Shaikh and Sunagar)
Araneomorphae	Latrodectus	SF109	Vulcan	Greek	This study (Shaikh and Sunagar)
Araneomorphae	Agelena	SF110	Panjurli	Hindu	This study (Shaikh and Sunagar)
Araneomorphae	Agelena	SF111	Guliga	Hindu	This study (Shaikh and Sunagar)
